# Supplementary material for: Using high-density SNP data to unravel the origin of the Franches-Montagnes horse breed
Source: PubMed Central journal article supplement (PMC11238448; doi:10.1186/s12711-024-00922-6), 2024-07-10

# Admixture

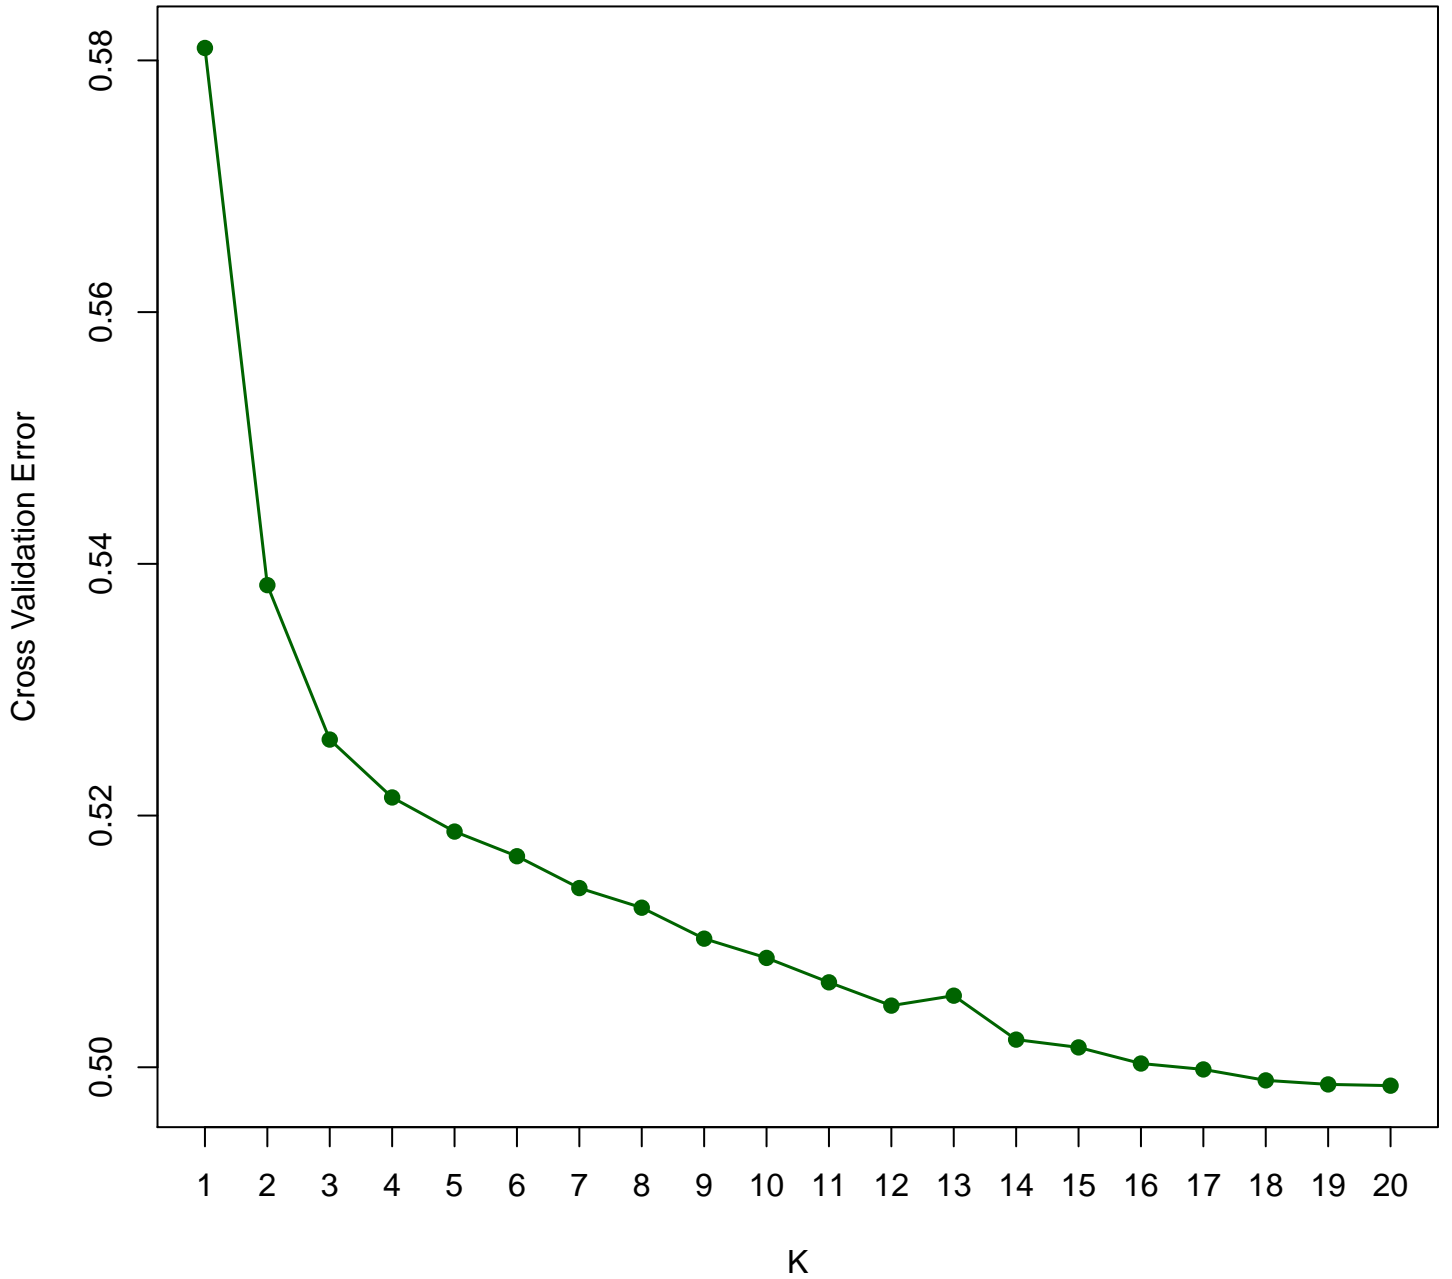

Supplement: 12711_2024_922_MOESM1_ESM.pdf [file 12711_2024_922_MOESM1_ESM.pdf]
