# Supplementary material for: Using high-density SNP data to unravel the origin of the Franches-Montagnes horse breed
Source: PubMed Central journal article supplement (PMC11238448; doi:10.1186/s12711-024-00922-6), 2024-07-10
Supplement: 12711_2024_922_MOESM2_ESM.pdf [file 12711_2024_922_MOESM2_ESM.pdf]

**Table S1:** Runs of homozygosity segments shared for over 50% of Purebred Arabians.

| Chr. | Length (MB) | Begin     | End       | Annotated genes                                                                                                                                                                               |
|------|-------------|-----------|-----------|-----------------------------------------------------------------------------------------------------------------------------------------------------------------------------------------------|
| 2    | 1.14        | 100852761 | 101993852 | <i>PGRMC2, LARP1B, ABHD18, MFSD8, PLK4, HSPA4L, SLC25A31, INTU</i>                                                                                                                            |
| 3    | 0.55        | 35410588  | 35959266  | <i>ZNF469, ZFPM1, ZC3H18, IL17C, CYBA, MVD, SNAI3, RNF166, CTU2, PIEZO1</i>                                                                                                                   |
| 3    | 1.93        | 36856010  | 38783069  | <i>FANCA, SPIRE2, TCF25, MC1R, TUBB3, DEF8, CENPBD1, DBNDD1, GAS8, PRDM7, CENPE, BDH2, SLC9B2, SLC9B1, CISD2, UBE2D3, MANBA, NFKB1, SLC39A8, BANK1</i>                                        |
| 3    | 0.81        | 120536237 | 121351057 | <i>NKX1-1, UVSSA, MAEA, CTBP1, SPON2, RNF212, FGFRL1, IDUA, SLC26A1, DGKQ, TMEM175, GAK, MIR9070, CPLX1, PCGF3, SLC49A3, MYL5, ATP5ME, PDE6B, PIGG</i>                                        |
| 4    | 0.87        | 55111503  | 55984784  | <i>IGF2BP3, TRA2A, CCDC126, FAM221A, STK31, NPY</i>                                                                                                                                           |
| 5    | 0.78        | 48918960  | 49698979  | <i>IGSF3, CD58, ATP1A1, MAB21L3, SLC22A15, NHLH2, CASQ2</i>                                                                                                                                   |
| 7    | 1.27        | 41107447  | 42375355  | <i>NTM, OPCML</i>                                                                                                                                                                             |
| 7    | 0.17        | 52293923  | 52464624  | -                                                                                                                                                                                             |
| 7    | 0.04        | 52805181  | 52849963  | -                                                                                                                                                                                             |
| 7    | 0.09        | 53235458  | 53321837  | -                                                                                                                                                                                             |
| 7    | 0.03        | 53368641  | 53397997  | -                                                                                                                                                                                             |
| 7    | 0.53        | 53441389  | 53972641  | -                                                                                                                                                                                             |
| 9    | 0.38        | 32376098  | 32759901  | <i>PXDNL</i>                                                                                                                                                                                  |
| 9    | 0.12        | 32770915  | 32889584  | -                                                                                                                                                                                             |
| 9    | 0.57        | 45650223  | 46219316  | <i>LAPTM4B, MATN2, RPL30, ERICH5, RIDA, POP1, NIPAL2, KCNS2, STK3</i>                                                                                                                         |
| 11   | 0.72        | 21768214  | 22490489  | <i>KRT39, KRT23, KRT20, KRT12, KRT10A, KRT10B, KRT28, KRT27, KRT26, KRT25, KRT24, KRT222, SMARCE1, CCR7, TNS4, IGFBP4, TOP2A, GJD3, RARA, CDC6, WIPF2, RAPGEFL1, CASC3, MSL1, NR1D1, THRA</i> |
| 11   | 0.98        | 26192181  | 27169261  | <i>ACSF2, CHAD, RSAD1, MYCBPAP, EPN3, SPATA20, CACNA1G, ABCC3, ANKRD40, LUC7L3, WFIKKN2, TOB1, SPAG9, NME1, NME2, MBTD1, UTP18, CA10</i>                                                      |
| 11   | 1.07        | 27917117  | 28986458  | -                                                                                                                                                                                             |
| 11   | 0.75        | 31361576  | 32109154  | <i>DGKE, TRIM25, COIL, SCPEP1, AKAP1, MSI2</i>                                                                                                                                                |
| 14   | 0.28        | 27144280  | 27427890  | <i>PDGFRB, CSF1R, HMGXB3, TIGD6, SLC26A2, PDE6A, PPARGC1B</i>                                                                                                                                 |
| 14   | 0.43        | 27439297  | 27866083  | <i>PPARGC1B, ARHGEF37, CSNK1A1, IL17B, PCYOX1L, GRPEL2, AFAP1L1</i>                                                                                                                           |
| 18   | 0.98        | 10299223  | 11275554  | <i>INHBB, RALB, TMEM185B, EPB41L5, PTPN4</i>                                                                                                                                                  |
| 18   | 0.68        | 49358178  | 50034758  | <i>SSB, METTL5, UBR3, MYO3B</i>                                                                                                                                                               |
| 19   | 0.45        | 53200565  | 53654053  | <i>CBLB, ALCAM</i>                                                                                                                                                                            |
| 22   | 0.19        | 1503919   | 1695123   | -                                                                                                                                                                                             |
| 22   | 0.60        | 23865659  | 24470011  | <i>KIF3B, ASXL1, NOL4L, COMMD7, DNMT3B, MAPRE1, EFCAB8, SUN5, BPIFB2, BPIFB6, BPIFB3, BPIFB4</i>                                                                                              |
