# Supplementary material for: Using high-density SNP data to unravel the origin of the Franches-Montagnes horse breed
Source: PubMed Central journal article supplement (PMC11238448; doi:10.1186/s12711-024-00922-6), 2024-07-10
Supplement: 12711_2024_922_MOESM3_ESM.pdf [file 12711_2024_922_MOESM3_ESM.pdf]

**Table S2:** Runs of homozygosity segments shared by over 50% of Shagya Arabians.

| Chr. | Length (MB) | Begin     | End       | Annotated genes                                                                                                                                                                                             |
|------|-------------|-----------|-----------|-------------------------------------------------------------------------------------------------------------------------------------------------------------------------------------------------------------|
| 1    | 0.02        | 9501779   | 9519364   | -                                                                                                                                                                                                           |
| 1    | 0.64        | 107739971 | 108378967 | <i>TARSL2, TJP1, FAM189A1</i>                                                                                                                                                                               |
| 2    | 1.06        | 27344713  | 28404281  | <i>OPRD1, YTHDF2, GMEB1, TAF12, RAB42, RCC1, PHACTR4, MED18, SESN2, ATP5IF1, DNAJC8, PTAFR, EYA3, XKR8, SMPDL3B, RPA2, THEMIS2, PPP1R8, STX12, FAM76A, IFI6, FGR, AHDC1</i>                                 |
| 3    | 0.93        | 120425335 | 121351057 | <i>NKX1-1, UVSSA, MAEA, CTBP1, SPON2, RNF212, FGFR1, IDUA, SLC26A1, DGKQ, TMEM175, GAK, MIR9070, CPLX1, PCGF3, SLC49A3, MYL5, ATP5ME, PDE6B, PIGG</i>                                                       |
| 6    | 0.18        | 8018928   | 8201303   | <i>ZNF142, BCS1L, RNF25, STK36, TTLL4, CYP27A1, PRKAG3</i>                                                                                                                                                  |
| 7    | 0.25        | 40755980  | 41002946  | <i>NTM</i>                                                                                                                                                                                                  |
| 7    | 0.88        | 41060288  | 41938373  | <i>NTM, OPCML</i>                                                                                                                                                                                           |
| 8    | 0.60        | 24634587  | 25231545  | <i>RHOF, SETD1B, HPD, PSMD9, WDR66, BCL7A, MLXIP, IL31, LRRC43, B3GNT4, DIABLO, VPS33A, CLIP1, ZCCHC8, RSRC2, KNTC1</i>                                                                                     |
| 8    | 0.27        | 25825349  | 26097405  | <i>KMT5A, RILPL2, SNRNP35, RILPL1, TMED2, DDX55, EIF2B1, GTF2H3, TCTN2, ATP6V0A2, DNAH10</i>                                                                                                                |
| 8    | 0.00        | 61839365  | 61839365  | -                                                                                                                                                                                                           |
| 9    | 0.53        | 31284516  | 31817479  | <i>RB1CC1, ALKAL1</i>                                                                                                                                                                                       |
| 9    | 0.76        | 31853320  | 32616875  | <i>ST18, PCMTD1</i>                                                                                                                                                                                         |
| 9    | 0.22        | 32677402  | 32897046  | <i>PXDNL</i>                                                                                                                                                                                                |
| 9    | 0.52        | 33532618  | 34053277  | <i>SNTG1</i>                                                                                                                                                                                                |
| 9    | 0.87        | 40515338  | 41382074  | <i>TRIQQ</i>                                                                                                                                                                                                |
| 9    | 0.58        | 41416774  | 41992448  | <i>FAM92A, RBM12B, TMEM67</i>                                                                                                                                                                               |
| 9    | 0.76        | 41998238  | 42758961  | <i>TMEM67, PDP1, CDH17, GEM, RAD54B, VIRMA</i>                                                                                                                                                              |
| 9    | 0.03        | 42822721  | 42852068  | <i>ESRP1, DPY19L4</i>                                                                                                                                                                                       |
| 9    | 0.01        | 45565108  | 45576777  | <i>MTDH</i>                                                                                                                                                                                                 |
| 9    | 0.92        | 45613807  | 46532261  | <i>LAPTM4B, MATN2, RPL30, ERICH5, RIDA, POP1, NIPAL2, KCNS2, STK3</i>                                                                                                                                       |
| 9    | 0.61        | 79742728  | 80350559  | <i>FAM135B, COL22A1</i>                                                                                                                                                                                     |
| 11   | 0.72        | 21898983  | 22614034  | <i>KRT10B, KRT28, KRT27, KRT26, KRT25, KRT24, KRT222, SMARCE1, CCR7, TNS4, IGFBP4, TOP2A, GJD3, RARA, CDC6, WIPF2, RAPGEFL1, CASC3, MSL1, NR1D1, THRA, MED24, CSF3, PSMD3, GSDMA, LRRC3C, ORMDL3, GSDMB</i> |
| 11   | 0.00        | 22654340  | 22654340  | <i>IKZF3</i>                                                                                                                                                                                                |
| 11   | 0.05        | 22703722  | 22750090  | <i>IKZF3, GRB7</i>                                                                                                                                                                                          |
| 11   | 0.31        | 22880941  | 23186362  | <i>CDK12, MED1, FBXL20, STAC2, RPL19, CACNB1, ARL5C, PLXDC1</i>                                                                                                                                             |
| 11   | 1.12        | 31314776  | 32434775  | <i>NOG, DGKE, TRIM25, COIL, SCPEP1, AKAP1, MSI2, CCDC182</i>                                                                                                                                                |
| 11   | 0.04        | 32617562  | 32658713  | <i>DYNLL2</i>                                                                                                                                                                                               |
| 11   | 0.58        | 32803157  | 33383463  | <i>LPO, MPO, TSPOAP1, RNF43, SUPT4H1, HSF5, MTMR4, TEX14, RAD51C, PPM1E</i>                                                                                                                                 |
| 11   | 0.23        | 34276336  | 34508997  | <i>MED13</i>                                                                                                                                                                                                |
| 11   | 0.01        | 34577854  | 34586693  | <i>BRIP1</i>                                                                                                                                                                                                |
| 11   | 0.12        | 34683002  | 34804064  | <i>BRIP1</i>                                                                                                                                                                                                |
| 15   | 1.04        | 80216896  | 81259084  | <i>NBAS, FAM84A</i>                                                                                                                                                                                         |
| 16   | 0.16        | 33620538  | 33782347  | <i>ERC2</i>                                                                                                                                                                                                 |
| 16   | 0.35        | 41847777  | 42194451  | <i>LTF, CCRL2, CCR5, CCR2, CCR3</i>                                                                                                                                                                         |
| 18   | 0.56        | 49358178  | 49917777  | <i>SSB, METTL5, UBR3, MYO3B</i>                                                                                                                                                                             |
| 18   | 0.51        | 50413659  | 50924378  | <i>TLK1, METTL8, DCAF17</i>                                                                                                                                                                                 |
| 18   | 0.09        | 81688757  | 81776604  | <i>CREB1, METTL21A</i>                                                                                                                                                                                      |
| 19   | 0.07        | 34349123  | 34421059  | <i>XXYL1</i>                                                                                                                                                                                                |
| 23   | 0.42        | 25249949  | 25673636  | <i>GLIS3, SLC1A1, SPATA6L, CDC37L1, AK3, RCL1</i>                                                                                                                                                           |
