# Supplementary material for: Using high-density SNP data to unravel the origin of the Franches-Montagnes horse breed
Source: PubMed Central journal article supplement (PMC11238448; doi:10.1186/s12711-024-00922-6), 2024-07-10
Supplement: 12711_2024_922_MOESM4_ESM.pdf [file 12711_2024_922_MOESM4_ESM.pdf]

**Table S3** : Runs of homozygosity segments shared by over 50% of Thoroughbreds.

| Chr. | Length (MB) | Begin     | End       | Annotated genes                                                                                                                                                                   |
|------|-------------|-----------|-----------|-----------------------------------------------------------------------------------------------------------------------------------------------------------------------------------|
| 1    | 0.59        | 841540    | 1435208   | <i>CFAP46, NKX6-2, INPP5A, PWWP2B</i>                                                                                                                                             |
| 1    | 1.14        | 22010452  | 23149101  | -                                                                                                                                                                                 |
| 1    | 0.17        | 33184195  | 33356486  | <i>ZNF518A, CCNJ, CC2D2B</i>                                                                                                                                                      |
| 1    | 0.02        | 33371412  | 33394390  | <i>CC2D2B</i>                                                                                                                                                                     |
| 1    | 0.38        | 33415244  | 33792526  | <i>ENTPD1, TCTN3, ALDH18A1, SORBS1</i>                                                                                                                                            |
| 1    | 0.37        | 41105674  | 41472996  | <i>PAPSS2, MINPP1, SGMS1</i>                                                                                                                                                      |
| 1    | 0.43        | 46911137  | 47336515  | -                                                                                                                                                                                 |
| 1    | 0.03        | 47375634  | 47405427  | -                                                                                                                                                                                 |
| 1    | 0.39        | 47421744  | 47812471  | -                                                                                                                                                                                 |
| 1    | 0.22        | 68536819  | 68761749  | -                                                                                                                                                                                 |
| 1    | 0.23        | 68768009  | 68999855  | <i>URB2, TAF5L, ABCB10, NUP133, ACTA1</i>                                                                                                                                         |
| 1    | 0.45        | 71888373  | 72334036  | <i>BMS1, ZNF248</i>                                                                                                                                                               |
| 1    | 0.68        | 85013819  | 85690537  | <i>GRID1</i>                                                                                                                                                                      |
| 1    | 0.64        | 93639301  | 94280015  | <i>CRTC3, BLM, FURIN, FES, MAN2A2, HDDC3, UNC45A, RCCD1, PRC1, VPS33B, NGRN, GDPGP1, CIB1, SEMA4B, IDH2, ZNF710</i>                                                               |
| 1    | 0.37        | 112717075 | 113088084 | <i>GABRB3</i>                                                                                                                                                                     |
| 1    | 0.17        | 113530630 | 113703332 | <i>GABRG3</i>                                                                                                                                                                     |
| 1    | 0.10        | 113767681 | 113866140 | <i>GABRG3</i>                                                                                                                                                                     |
| 1    | 0.05        | 113952712 | 114006066 | -                                                                                                                                                                                 |
| 1    | 0.00        | 123226504 | 123229881 | -                                                                                                                                                                                 |
| 2    | 0.41        | 64662562  | 65067588  | -                                                                                                                                                                                 |
| 2    | 0.10        | 65086799  | 65187559  | -                                                                                                                                                                                 |
| 3    | 0.36        | 22526491  | 22886805  | <i>DHX38, TXNL4B, DHODH, PKD1L3, IST1, ZNF821, ATXN1L, AP1G1, PHLPP2</i>                                                                                                          |
| 3    | 0.63        | 23444991  | 24072266  | <i>HYDIN, VAC14, MTSS1L, IL34, SF3B3, COG4, FUK, ST3GAL2, AARS, EXOSC6, CLEC18B</i>                                                                                               |
| 3    | 0.55        | 40028601  | 40581467  | <i>DNAJB14, LAMTOR3, DAPP1, MTPP, TRMT10A</i>                                                                                                                                     |
| 3    | 0.13        | 58442558  | 58572539  | -                                                                                                                                                                                 |
| 4    | 0.78        | 15528412  | 16305907  | <i>CCM2, NACAD, TBG4, RAMP3, ADCY1, IGFBP1, IGFBP3</i>                                                                                                                            |
| 4    | 0.49        | 44067176  | 44558669  | <i>NDUFA4, PHF14</i>                                                                                                                                                              |
| 4    | 0.01        | 44578375  | 44592736  | -                                                                                                                                                                                 |
| 4    | 0.99        | 52210255  | 53198512  | <i>MACC1, ITGB8, ABCB5, SP8</i>                                                                                                                                                   |
| 4    | 0.04        | 55776953  | 55819015  | -                                                                                                                                                                                 |
| 5    | 0.81        | 52075884  | 52883274  | <i>SLC16A1, FAM19A3, PPM1J, RHOC, MOV10, CAPZA1, ST7L, WNT2B, CTTNBP2NL,</i>                                                                                                      |
| 5    | 0.15        | 54254470  | 54401315  | <i>KCNA2, KCNA10, PROK1</i>                                                                                                                                                       |
| 5    | 0.01        | 54467121  | 54473450  | -                                                                                                                                                                                 |
| 5    | 0.60        | 54607188  | 55203319  | <i>SLC6A17, UBL4B, ALX3, STRIP1, AHCYL1, CSF1, EPS8L3, GSTM3, AMPD2, GNAT2, MIR197, GNAI3, GPR61, AMIGO1, ATXN7L2</i>                                                             |
| 6    | 1.13        | 21644998  | 22775700  | <i>AGAP1, GBX2, ASB18, IQCA1, ACKR3</i>                                                                                                                                           |
| 6    | 0.84        | 23669396  | 24511131  | <i>LRRFIP1, RBM44, RAMP1, UBE2F, SCLY, ESPNL, KLHL30, ERFE, ILKAP, HES6, PER2, TRAF3IP1</i>                                                                                       |
| 6    | 0.09        | 42866900  | 42960667  | -                                                                                                                                                                                 |
| 6    | 0.00        | 42965882  | 42966523  | -                                                                                                                                                                                 |
| 6    | 0.40        | 43084381  | 43480499  | <i>ATF7IP, PLBD1, GUCY2C, WBP11, SMCO3, ART4</i>                                                                                                                                  |
| 6    | 0.52        | 68244053  | 68766546  | <i>FMNL3, TMBIM6, NCKAP5L, BCDIN3D, FAIM2, AQP2, AQP5, AQP6, RACGAP1, ASIC1, SMARCD1, GPD1, CERS5, LIMA1</i>                                                                      |
| 6    | 0.61        | 70863528  | 71473496  | <i>KRT8, KRT18, EIF4B, TNS2, SPRYD3, IGFBP6, SOAT2, CSAD, ZNF740, ITGB7, RARG, MFSD5, ESPL1, PFDN5, AAAS, SP7, SP1, AMHR2, PRR13, PCBP2, MAP3K12, TARBP2, NPFF, ATF7, ATP5MC2</i> |
| 6    | 0.00        | 71855266  | 71855914  | -                                                                                                                                                                                 |
| 7    | 0.17        | 40386493  | 40560613  | -                                                                                                                                                                                 |
| 7    | 1.56        | 41434416  | 42997806  | <i>NTM, OPCML</i>                                                                                                                                                                 |
| 7    | 1.02        | 43046689  | 44065860  | <i>SPATA19, IGSF9B, JAM3, NCAPD3, VPS26B, ACAD8, THYN1, B3GAT1</i>                                                                                                                |
| 7    | 0.07        | 44109054  | 44181928  | -                                                                                                                                                                                 |
| 7    | 0.57        | 44418390  | 44988705  | -                                                                                                                                                                                 |

Additional Table 3 - continued

|    |      |          |          |                                                                                                                                         |
|----|------|----------|----------|-----------------------------------------------------------------------------------------------------------------------------------------|
| 7  | 0.45 | 45886267 | 46334427 | <i>ADGRE5, ADGRL1, PRKACA, SAMD1, MISP3, PALM3, IL27RA, RLN3, MIR1271B, RFX1, DCAF15, PODNL1, CC2D1A, NANOS3, ZSWIM4, MRI1, CCDC130</i> |
| 7  | 0.96 | 46961963 | 47917776 | <i>MAN2B1</i>                                                                                                                           |
| 8  | 0.65 | 44239408 | 44892092 | <i>ENOSF1, YES1, ADCYAP1</i>                                                                                                            |
| 9  | 0.44 | 67863639 | 68304060 | <i>ATAD2, WDYHV1, FBXO32, KLHL38, ANXA13, FAM91A1, FER1L6</i>                                                                           |
| 9  | 0.02 | 70089528 | 70111792 | -                                                                                                                                       |
| 10 | 0.01 | 15133223 | 15146131 | -                                                                                                                                       |
| 11 | 0.50 | 2407702  | 2910649  | <i>RPTOR, NPTX1, ENDOV, RNF213, SLC26A11, SGSH, CARD14, EIF4A3, GAA, CCDC40, TBC1D16</i>                                                |
| 11 | 0.05 | 23186362 | 23238557 | <i>PLXDC1</i>                                                                                                                           |
| 12 | 0.49 | 36456898 | 36942815 | <i>MOB2, DUSP8, RNH1, PTDSS2, ANO9, SIGIRR, PKP3, B4GALNT4, IFITM5, PGGHG, NLRP6, PSMD13</i>                                            |
| 14 | 0.42 | 15982846 | 16398029 | <i>MAT2B, HMMR, NUDCD2, CCNG1</i>                                                                                                       |
| 14 | 0.03 | 16437615 | 16467602 | -                                                                                                                                       |
| 14 | 0.36 | 27144280 | 27500357 | <i>PDGFRB, CSF1R, HMGXB3, TIGD6, SLC26A2, PDE6A, PPARGC1B</i>                                                                           |
| 14 | 0.99 | 40943485 | 41931301 | <i>VDAC1, FSTL4, HSPA4, ZCCHC10</i>                                                                                                     |
| 14 | 0.49 | 41989512 | 42478605 | <i>AFF4, LEAP2, GDF9, SHROOM1, SOWAHA, SEPT8, KIF3A, IL4, IL13, RAD50, IL5, IRF1, SLC22A5</i>                                           |
| 14 | 0.51 | 46642345 | 47156636 | <i>MEGF10, MARCH3, LMNB1, TEX43, PHAX, ALDH7A1</i>                                                                                      |
| 16 | 0.38 | 34619130 | 34998423 | <i>CACNA2D3</i>                                                                                                                         |
| 16 | 0.27 | 35029621 | 35299636 | <i>CACNA2D3</i>                                                                                                                         |
| 16 | 0.02 | 35321893 | 35341801 | -                                                                                                                                       |
| 16 | 0.92 | 35390401 | 36312167 | <i>SELENOK, ACTR8, IL17RB, CHDH, CACNA1D, DCP1A, TKT, PRKCD, RFT1, SFMBT1</i>                                                           |
| 17 | 2.04 | 20626515 | 22665932 | <i>KCNRG, TRIM13, SPRYD7, KPNA3, EBPL, ARL11, RCBTB1, SETDB2, CAB39L, CDADC1, MLNR, FNDC3A, CYSLTR2, RCBTB2, RB1, LPAR6, ITM2B</i>      |
| 18 | 0.06 | 30087303 | 30146071 | -                                                                                                                                       |
| 18 | 0.18 | 42472474 | 42650850 | <i>DPP4, GCG, FAP</i>                                                                                                                   |
| 18 | 0.08 | 49443663 | 49527351 | <i>UBR3</i>                                                                                                                             |
| 18 | 0.82 | 49579653 | 50401745 | <i>UBR3, MYO3B, SP5, ERICH2, GAD1, GORASP2, TLK1</i>                                                                                    |
| 18 | 0.44 | 66605255 | 67042719 | <i>MSTN, HIBCH, INPP1, MFSD6, NEMP2</i>                                                                                                 |
| 21 | 0.02 | 55559098 | 55579756 | -                                                                                                                                       |
| 21 | 0.16 | 55620187 | 55776417 | -                                                                                                                                       |
| 21 | 0.04 | 55810398 | 55845927 | -                                                                                                                                       |
| 21 | 0.45 | 56708164 | 57162831 | <i>IRX2</i>                                                                                                                             |
| 22 | 0.56 | 1154739  | 1712638  | <i>SYNDIG1</i>                                                                                                                          |
| 23 | 0.77 | 33553984 | 34327444 | <i>NFIB, ZDHHC21</i>                                                                                                                    |
