# Supplementary material for: Using high-density SNP data to unravel the origin of the Franches-Montagnes horse breed
Source: PubMed Central journal article supplement (PMC11238448; doi:10.1186/s12711-024-00922-6), 2024-07-10
Supplement: 12711_2024_922_MOESM5_ESM.pdf [file 12711_2024_922_MOESM5_ESM.pdf]

**Table S4** : Runs of homozygosity segments shared by over 50% of Old-type Franches-Montagnes.

| Chr. | Length (Mb) | Begin     | End       | Annotated genes                                                                                                                                                                                                                                                                                                                                                                                                                                                               |
|------|-------------|-----------|-----------|-------------------------------------------------------------------------------------------------------------------------------------------------------------------------------------------------------------------------------------------------------------------------------------------------------------------------------------------------------------------------------------------------------------------------------------------------------------------------------|
| 1    | 0.58        | 30925921  | 31506917  | <i>HPSE2, HPS1, PYROXD2, R3HCC1L, LOXL4</i>                                                                                                                                                                                                                                                                                                                                                                                                                                   |
| 3    | 0.92        | 120431916 | 121351057 | <i>NKX1-1, UVSSA, MAEA, CTBP1, SPON2, RNF212, FGFR1, IDUA, SLC26A1, DGKQ, TMEM175, GAK, MIR9070, CPLX1, PCGF3, SLC49A3, MYL5, ATP5ME, PDE6B, PIGG</i>                                                                                                                                                                                                                                                                                                                         |
| 4    | 0.09        | 52661137  | 52750288  | -                                                                                                                                                                                                                                                                                                                                                                                                                                                                             |
| 8    | 0.50        | 38208512  | 38709040  | <i>APCDD1, NAPG, PIEZO2</i>                                                                                                                                                                                                                                                                                                                                                                                                                                                   |
| 10   | 0.16        | 31082208  | 31239467  | <i>MYO6, IMPG1</i>                                                                                                                                                                                                                                                                                                                                                                                                                                                            |
| 10   | 0.20        | 31314431  | 31514864  | -                                                                                                                                                                                                                                                                                                                                                                                                                                                                             |
| 10   | 0.51        | 31996052  | 32503989  | <i>HTR1B</i>                                                                                                                                                                                                                                                                                                                                                                                                                                                                  |
| 11   | 2.46        | 23273876  | 25734280  | <i>FBXO47, LASP1, RPL23, CWC25, PIP4K2B, PSMB3, PCGF2, CISD3, MLLT6, EPOP, SRCIN1, ARHGAP23, SOCS7, GPR179, MRPL45, NPEPPS, KPNB1, TBKBP1, TBX21, OSBPL7, MRPL10, LRRC46, SCRIN2, SP6, SP2, PNPO, PRR15L, CDK5RAP3, COPZ2, NFE2L1, CBX1, SNX11, SKAP1, HOXB1, HOXB2, HOXB3, HOXB5, HOXB6, HOXB7, HOXB8, HOXB9, HOXB13, TTLL6, CALCOCO2, ATP5MC1, UBE2Z, SNF8, GIP, IGF2BP1, B4GALNT2, GNGT2, ABI3, PHOSPHO1, ZNF652, PHB, NGFR, NXPH3, SPOP, SLC35B1, FAM117A, KAT7, TAC4</i> |
| 11   | 0.07        | 30922916  | 30989489  | -                                                                                                                                                                                                                                                                                                                                                                                                                                                                             |
| 15   | 0.57        | 9495555   | 10066795  | <i>AFF3</i>                                                                                                                                                                                                                                                                                                                                                                                                                                                                   |
| 15   | 0.59        | 24560550  | 25147192  | <i>CTNNA2</i>                                                                                                                                                                                                                                                                                                                                                                                                                                                                 |
