# Supplementary material for: Using high-density SNP data to unravel the origin of the Franches-Montagnes horse breed
Source: PubMed Central journal article supplement (PMC11238448; doi:10.1186/s12711-024-00922-6), 2024-07-10
Supplement: 12711_2024_922_MOESM6_ESM.pdf [file 12711_2024_922_MOESM6_ESM.pdf]

**Table S5** : Runs of homozygosity segments shared by over 50% of Franches-Montagnes.

| Chr. | Length (Mb) | Begin     | End       | Annotated genes                                                                                                                                                                                                                                                                                                                                                                                                                                 |
|------|-------------|-----------|-----------|-------------------------------------------------------------------------------------------------------------------------------------------------------------------------------------------------------------------------------------------------------------------------------------------------------------------------------------------------------------------------------------------------------------------------------------------------|
| 1    | 0.51        | 30971234  | 31479608  | <i>HPSE2, HPS1, PYROXD2, R3HCC1L, LOXL4</i>                                                                                                                                                                                                                                                                                                                                                                                                     |
| 2    | 0.53        | 27876021  | 28462821  | <i>PTAFR, EYA3, XKR8, SMPDL3B, RPA2, THEMIS2, PPP1R8, STX12, FAM76A, IFI6, FGR, AHDC1</i>                                                                                                                                                                                                                                                                                                                                                       |
| 3    | 0.91        | 120437951 | 121351057 | <i>NKX1-1, UVSSA, MAEA, CTBP1, SPON2, RNF212, FGFR1, IDUA, SLC26A1, DGKQ, TMEM175, GAK, CPLX1, PCGF3, SLC49A3, MYL5, ATP5ME, PDE6B, PIGG</i>                                                                                                                                                                                                                                                                                                    |
| 11   | 2.32        | 23273876  | 25588903  | <i>FBXO47, LASP1, RPL23, CWC25, PIP4K2B, PSMB3, PCGF2, CISD3, MLLT6, EPOP, SRCIN1, ARHGAP23, SOCS7, GPR179, MRPL45, NPEPPS, KPNB1, TBKBP1, TBX21, OSBPL7, MRPL10, LRRC46, SCRIN2, SP6, SP2, PNPO, PRR15L, CDK5RAP3, COPZ2, NFE2L1, CBX1, SNX11, SKAP1, HOXB1, HOXB2, HOXB3, HOXB5, HOXB6, HOXB7, HOXB8, HOXB9, HOXB13, TTLL6, CALCOCO2, ATP5MC1, UBE2Z, SNF8, GIP, IGF2BP1, B4GALNT2, GNGT2, ABI3, PHOSPHO1, ZNF652, PHB, NGFR, NXPH3, SPOP</i> |
| 11   | 0.28        | 26151832  | 26426827  | <i>LRRC59, ACSF2, CHAD, RSAD1, MYCBPAP, EPN3, SPATA20, CACNA1G, ABCC3, ANKRD40, LUC7L3</i>                                                                                                                                                                                                                                                                                                                                                      |
| 11   | 0.03        | 26485440  | 26516656  | <i>WFIKKN2</i>                                                                                                                                                                                                                                                                                                                                                                                                                                  |
| 11   | 0.26        | 31311231  | 31570264  | <i>NOG, DGKE</i>                                                                                                                                                                                                                                                                                                                                                                                                                                |
