# Supplementary material for: Using high-density SNP data to unravel the origin of the Franches-Montagnes horse breed
Source: PubMed Central journal article supplement (PMC11238448; doi:10.1186/s12711-024-00922-6), 2024-07-10
Supplement: 12711_2024_922_MOESM7_ESM.pdf [file 12711_2024_922_MOESM7_ESM.pdf]

**Table S6:** Gene ontology analysis for the Purebred Arabians

| Term                                                         | Bonferroni adjusted p-value | N genes | Genes                                                                                                                                                                      |
|--------------------------------------------------------------|-----------------------------|---------|----------------------------------------------------------------------------------------------------------------------------------------------------------------------------|
| <b>GO biological process</b>                                 |                             |         |                                                                                                                                                                            |
| intermediate filament organization (GO:0045109)              | 7.29E-09                    | 11      | <i>KRT24, KRT25, KRT12, KRT28, KRT10B, KRT27, KRT23, KRT20, KRT10A, KRT39, KRT26</i>                                                                                       |
| intermediate filament cytoskeleton organization (GO:0045104) | 9.17E-09                    | 12      | <i>KRT24, KRT25, KRT12, KRT28, KRT10B, KRT27, KRT23, KRT20, KRT10A, KRT39, CSNK1A1, KRT26</i>                                                                              |
| intermediate filament-based process (GO:0045103)             | 1.07E-08                    | 12      | <i>KRT24, KRT25, KRT12, KRT28, KRT10B, KRT27, KRT23, KRT20, KRT10A, KRT39, CSNK1A1, KRT26</i>                                                                              |
| epithelial cell differentiation (GO:0030855)                 | 1.02E-03                    | 15      | <i>KRT24, KRT25, THRA, INTU, KRT12, PLK4, KRT28, RARA, KRT10B, KRT27, KRT23, KRT20, KRT10A, KRT39, KRT26</i>                                                               |
| <b>GO molecular function</b>                                 |                             |         |                                                                                                                                                                            |
| -                                                            | -                           | -       | -                                                                                                                                                                          |
| <b>GO cellular component</b>                                 |                             |         |                                                                                                                                                                            |
| intermediate filament (GO:0005882)                           | 2.32E-09                    | 13      | <i>KRT24, KRT25, KRT12, KRT28, KRT10B, KRT27, KRT23, KRT20, KRT10A, KRT39, CSNK1A1, KRT222, KRT26</i>                                                                      |
| intermediate filament cytoskeleton (GO:0045111)              | 2.63E-08                    | 13      | <i>KRT24, KRT25, KRT12, KRT28, KRT10B, KRT27, KRT23, KRT20, KRT10A, KRT39, CSNK1A1, KRT222, KRT26</i>                                                                      |
| polymeric cytoskeletal fiber (GO:0099513)                    | 8.97E-05                    | 18      | <i>KRT24, KRT25, MAPRE1, CENPE, KIF3B, KRT12, KRT28, KRT10B, KRT27, KRT23, KRT20, KRT10A, KRT39, TUBB3, CSNK1A1, KRT222, GAS8, KRT26</i>                                   |
| supramolecular fiber (GO:0099512)                            | 1.35E-03                    | 19      | <i>KRT24, KRT25, MAPRE1, CENPE, KIF3B, KRT12, KRT28, KRT10B, KRT27, KRT23, KRT20, KRT10A, KRT39, CASQ2, TUBB3, CSNK1A1, KRT222, GAS8, KRT26</i>                            |
| supramolecular polymer (GO:0099081)                          | 1.48E-03                    | 19      | <i>KRT24, KRT25, MAPRE1, CENPE, KIF3B, KRT12, KRT28, KRT10B, KRT27, KRT23, KRT20, KRT10A, KRT39, CASQ2, TUBB3, CSNK1A1, KRT222, GAS8, KRT26</i>                            |
| supramolecular complex (GO:0099080)                          | 1.06E-03                    | 23      | <i>KRT24, SSB, KRT25, MAPRE1, CENPE, KIF3B, LARP1B, KRT12, STK31, KRT28, KRT10B, KRT27, KRT23, KRT20, CASC3, KRT10A, KRT39, CASQ2, TUBB3, CSNK1A1, KRT222, GAS8, KRT26</i> |
