# Supplementary material for: Using high-density SNP data to unravel the origin of the Franches-Montagnes horse breed
Source: PubMed Central journal article supplement (PMC11238448; doi:10.1186/s12711-024-00922-6), 2024-07-10
Supplement: 12711_2024_922_MOESM9_ESM.pdf [file 12711_2024_922_MOESM9_ESM.pdf]

**Table S8** : Gene ontology analysis for the Thoroughbred

| Term                                                                   | Bonferroni adjusted p-value | N genes | Genes                                                                                                                                                                                                         |
|------------------------------------------------------------------------|-----------------------------|---------|---------------------------------------------------------------------------------------------------------------------------------------------------------------------------------------------------------------|
| <b>GO cellular component</b><br>plasma membrane region<br>(GO:0098590) | 3.96E-02                    | 27      | <i>ADGRL1, EPS8L3, GRID1, ADCY1, SLC26A2, KCNA2, MTTP, FAP, PDE6A, CIB1, DPP4, AQP6, SEMA4B, LIMA1, GABRB3, KRT8, SLC26A11, PRKACA, AQP2, GABRG3, SHROOM1, SLC22A5, SLC16A1, SYNDIG1, AQP2, RACGAP1, AQP5</i> |
