# Supplementary material for: Using high-density SNP data to unravel the origin of the Franches-Montagnes horse breed
Source: PubMed Central journal article supplement (PMC11238448; doi:10.1186/s12711-024-00922-6), 2024-07-10
Supplement: 12711_2024_922_MOESM11_ESM.pdf [file 12711_2024_922_MOESM11_ESM.pdf]

**Table S10** : Gene ontology analysis for the Franches-Montagnes population

| Term                                                 | Bonferroni adjusted p-value | N genes | Genes                                                                                                                                                                                                                                          |
|------------------------------------------------------|-----------------------------|---------|------------------------------------------------------------------------------------------------------------------------------------------------------------------------------------------------------------------------------------------------|
| <b>GO biological process</b>                         |                             |         |                                                                                                                                                                                                                                                |
| rhombomere development (GO:0021546)                  | 1.69E-02                    | 3       | <i>HOXB2, HOXB1, HOXB3</i>                                                                                                                                                                                                                     |
| embryonic skeletal system morphogenesis (GO:0048704) | 2.93E-03                    | 6       | <i>HOXB9, NOG, HOXB2, HOXB1, HOXB5, HOXB3</i>                                                                                                                                                                                                  |
| embryonic skeletal system development (GO:0048706)   | 1.29E-02                    | 6       | <i>HOXB9, NOG, HOXB2, HOXB1, HOXB5, HOXB3</i>                                                                                                                                                                                                  |
| skeletal system morphogenesis (GO:0048705)           | 5.09E-03                    | 8       | <i>FGR, HOXB9, NOG, HOXB2, HOXB1, HOXB5, HOXB3, PHOSPHO1</i>                                                                                                                                                                                   |
| <b>GO cellular component</b>                         |                             |         |                                                                                                                                                                                                                                                |
| nucleoplasm (GO:0005654)                             | 4.80E-03                    | 27      | <i>PPP1R8, HOXB9, NFE2L1, EPN3, SKAP1, DGKE, DGKQ, CTBP1, CALCOCO2, UBE2Z, SPOP, HOXB2, IGF2BP1, HOXB13, HOXB1, HOXB5, MRPL10, CBX1, HOXB3, STX12, UVSSA, SP2, EYA3, FAM76A, LUC7L3, RPL23, PIP4K2B</i>                                        |
| nuclear lumen (GO:0031981)                           | 1.11E-03                    | 31      | <i>PPP1R8, CDK5RAP3, HOXB9, NFE2L1, EPN3, SKAP1, DGKE, DGKQ, CTBP1, CALCOCO2, UBE2Z, SPOP, MAEA, HOXB2, IGF2BP1, HOXB13, HOXB1, HOXB5, RNF212, MRPL10, CBX1, HOXB3, STX12, UVSSA, SP2, EYA3, FAM76A, LUC7L3, RPL23, RPA2, PIP4K2B</i>          |
| organelle lumen (GO:0043233)                         | 5.46E-03                    | 32      | <i>PPP1R8, CDK5RAP3, HOXB9, NFE2L1, EPN3, SKAP1, DGKE, DGKQ, CTBP1, CALCOCO2, UBE2Z, SPOP, MAEA, HOXB2, IGF2BP1, HOXB13, PYROXD2, HOXB1, HOXB5, RNF212, MRPL10, CBX1, HOXB3, STX12, UVSSA, SP2, EYA3, FAM76A, LUC7L3, RPL23, RPA2, PIP4K2B</i> |
| intracellular organelle lumen (GO:0070013)           | 5.46E-03                    | 32      | <i>PPP1R8, CDK5RAP3, HOXB9, NFE2L1, EPN3, SKAP1, DGKE, DGKQ, CTBP1, CALCOCO2, UBE2Z, SPOP, MAEA, HOXB2, IGF2BP1, HOXB13, PYROXD2, HOXB1, HOXB5, RNF212, MRPL10, CBX1, HOXB3, STX12, UVSSA, SP2, EYA3, FAM76A, LUC7L3, RPL23, RPA2, PIP4K2B</i> |
| membrane-enclosed lumen (GO:0031974)                 | 5.46E-03                    | 32      | <i>PPP1R8, CDK5RAP3, HOXB9, NFE2L1, EPN3, SKAP1, DGKE, DGKQ, CTBP1, CALCOCO2, UBE2Z, SPOP, MAEA, HOXB2, IGF2BP1, HOXB13, PYROXD2, HOXB1, HOXB5, RNF212, MRPL10, CBX1, HOXB3, STX12, UVSSA, SP2, EYA3, FAM76A, LUC7L3, RPL23, RPA2, PIP4K2B</i> |
