# Supplementary material for: Using high-density SNP data to unravel the origin of the Franches-Montagnes horse breed
Source: Springer Nature journal article supplement (doi:10.1186/s12711-024-00922-6), 2024-07-10
Supplement: MOESM8 [file 12711_2024_922_MOESM8_ESM.pdf]

**Table S7:** Gene ontology analysis for the Shagya Arabians

| Term                                                                     | Bonferroni adjusted p-value | N genes | Genes                                                                                                                                                                                                                                                                                                                                                                                                                                                                                                                                                                                                                                                                                                                                                                                                                                                                                                                                                                   |
|--------------------------------------------------------------------------|-----------------------------|---------|-------------------------------------------------------------------------------------------------------------------------------------------------------------------------------------------------------------------------------------------------------------------------------------------------------------------------------------------------------------------------------------------------------------------------------------------------------------------------------------------------------------------------------------------------------------------------------------------------------------------------------------------------------------------------------------------------------------------------------------------------------------------------------------------------------------------------------------------------------------------------------------------------------------------------------------------------------------------------|
| <b>GO biological process</b>                                             |                             |         |                                                                                                                                                                                                                                                                                                                                                                                                                                                                                                                                                                                                                                                                                                                                                                                                                                                                                                                                                                         |
| regulation of transcription initiation by RNA polymerase II (GO:0060260) | 3.38E-02                    | 5       | <i>MED24, THRA, TAF12, MED13, MED1</i>                                                                                                                                                                                                                                                                                                                                                                                                                                                                                                                                                                                                                                                                                                                                                                                                                                                                                                                                  |
| <b>GO molecular function</b>                                             |                             |         |                                                                                                                                                                                                                                                                                                                                                                                                                                                                                                                                                                                                                                                                                                                                                                                                                                                                                                                                                                         |
| transcription factor binding (GO:0008134)                                | 6.53E-03                    | 14      | <i>RNF25, MED24, THRA, STK36, DGKQ, CTBP1, RARA, TAF12, SMARCE1, MTDH, MED13, CREB1, MED1, NR1D1</i>                                                                                                                                                                                                                                                                                                                                                                                                                                                                                                                                                                                                                                                                                                                                                                                                                                                                    |
| binding (GO:0005488)                                                     | 4.39E-03                    | 128     | <i>CDK12, CLIP1, UBR3, STAC2, CCR7, SSB, DDX55, KNTC1, RNF25, MTMR4, IKZF3, PPP1R8, IL31, MED24, CCR3, AK3, TEX14, LOC100068349, TOP2A, RHOF, FGR, RPL19, GEM, THRA, TRNAU1AP, RB1CC1, DNAJC8, POP1, WIPF2, LAPTM4B, PDP1, SPATA6L, NKX1-1, FGFRL1, YTHDF2, IGFBP4, DGKE, NOG, MSI2, CSF3, LPO, GAK, STK36, DGKQ, ATP5IF1, CTBP1, RARA, TAF12, CDC37L1, ALKAL1, METTL5, KRT27, AKAP1, PDE6B, OPRD1, RILPL1, SMARCE1, MYO3B, SESN2, CDC6, DNAH10, MAEA, PDXNL, MATN2, XXYLT1, PRKAG3, TSPOAP1, STK3, GLIS3, CCRL2, CASC3, BRIP1, GTF2H3, MSL1, NBAS, PPM1E, CCR2, TJP1, HPD, MPO, LRRC43, HSF5, RAD51C, RNF212, SETD1B, SLC1A1, GSDMA, MTDH, MED13, CREB1, RILPL2, RAB42, TRIM25, GSDMB, LTF, SNRNP35, RAD54B, MED1, MYL5, STX12, UVSSA, SUPT4H1, METTL8, PHACTR4, ATP6V0A2, ESRP1, ZNF142, CDH17, NR1D1, ZCCHC8, RBM12B, MLXIP, LTF, EIF2B1, EYA3, GMEB1, BCS1L, SMPDL3B, SPON2, ARL5C, RPL30, COIL, RNF43, CYP27A1, LOC100147364, RPA2, CPLX1, ST18</i>                |
| <b>GO cellular component</b>                                             |                             |         |                                                                                                                                                                                                                                                                                                                                                                                                                                                                                                                                                                                                                                                                                                                                                                                                                                                                                                                                                                         |
| intermediate filament (GO:0005882)                                       | 4.15E-02                    | 7       | <i>KRT24, KRT25, KRT28, KRT10B, KRT27, KRT222, KRT26</i>                                                                                                                                                                                                                                                                                                                                                                                                                                                                                                                                                                                                                                                                                                                                                                                                                                                                                                                |
| organelle (GO:0043226)                                                   | 4.33E-04                    | 128     | <i>CDK12, CLIP1, KRT24, CCR7, SSB, DDX55, KNTC1, RNF25, IKZF3, PPP1R8, MED24, AK3, TEX14, LOC100068349, TOP2A, FGR, SLC49A3, KRT25, RPL19, TCTN2, THRA, TRNAU1AP, RB1CC1, DNAJC8, ERC2, POP1, TMEM67, IFI6, LAPTM4B, PDP1, SPATA6L, SNTG1, NKX1-1, KRT28, YTHDF2, ORMDL3, DIABLO, PIGG, DGKE, MSI2, GAK, STK36, DGKQ, ATP5IF1, CTBP1, RARA, TAF12, TMED2, KMT5A, METTL5, KRT10B, TMEM175, KRT27, AKAP1, PDE6B, RCL1, OPRD1, RILPL1, SMARCE1, MYO3B, SESN2, THEMIS2, CDC6, B3GNT4, DNAH10, MAEA, XXYLT1, PRKAG3, TSPOAP1, DPY19L4, STK3, GLIS3, CASC3, BRIP1, GTF2H3, TRIQK, MSL1, NBAS, PPM1E, PCGF3, TJP1, AHDC1, HPD, MPO, LRRC43, HSF5, RAD51C, RNF212, SETD1B, SLC1A1, MTDH, MED13, CREB1, RILPL2, VPS33A, LTF, SNRNP35, RAD54B, MED1, STX12, UVSSA, SUPT4H1, METTL8, ATP6V0A2, ESRP1, ZNF142, VIRMA, NR1D1, ZCCHC8, KRT222, RBM12B, MLXIP, LTF, EYA3, DCAF17, FAM76A, GMEB1, BCS1L, ARL5C, KRT26, RPL30, COIL, CYP27A1, LOC100147364, RPA2, ST18, BCL7A, PSMD9</i> |
| intracellular organelle (GO:0043229)                                     | 1.47E-03                    | 124     | <i>CDK12, CLIP1, KRT24, CCR7, SSB, DDX55, KNTC1, RNF25, IKZF3, PPP1R8, MED24, AK3, TEX14, LOC100068349, TOP2A, FGR, SLC49A3, KRT25, RPL19, THRA, TRNAU1AP, RB1CC1, DNAJC8, ERC2, POP1, IFI6, LAPTM4B, PDP1, SNTG1, NKX1-1, KRT28, YTHDF2, ORMDL3, DIABLO, PIGG, DGKE, MSI2, GAK, STK36, DGKQ, ATP5IF1, CTBP1, RARA, TAF12, TMED2, KMT5A, METTL5, KRT10B, TMEM175, KRT27, AKAP1, RCL1, OPRD1, RILPL1, SMARCE1, MYO3B, SESN2, THEMIS2, CDC6, B3GNT4, DNAH10, MAEA, XXYLT1, PRKAG3, TSPOAP1, DPY19L4, STK3, GLIS3, CASC3, BRIP1, GTF2H3, TRIQK, MSL1, NBAS, PPM1E, PCGF3, TJP1, AHDC1, HPD, MPO, LRRC43, HSF5, RAD51C, RNF212, SETD1B, SLC1A1, MTDH, MED13, CREB1, RILPL2, VPS33A, LTF, SNRNP35, RAD54B, MED1, STX12, UVSSA, SUPT4H1, METTL8, ATP6V0A2, ESRP1, ZNF142, VIRMA, NR1D1, ZCCHC8, KRT222, RBM12B, MLXIP, LTF, EYA3, DCAF17, FAM76A, GMEB1, BCS1L, ARL5C, KRT26, RPL30, COIL, CYP27A1, LOC100147364, RPA2, ST18, BCL7A, PSMD9</i>                                |
| membrane-bounded organelle (GO:0043227)                                  | 2.52E-02                    | 113     | <i>CDK12, CLIP1, CCR7, SSB, DDX55, RNF25, IKZF3, PPP1R8, MED24, AK3, LOC100068349, TOP2A, SLC49A3, TCTN2, THRA, TRNAU1AP, RB1CC1, DNAJC8, POP1, TMEM67, IFI6, LAPTM4B, PDP1, SPATA6L, NKX1-1, YTHDF2, ORMDL3, DIABLO, PIGG, DGKE, MSI2, GAK, STK36, DGKQ, ATP5IF1, CTBP1, RARA, TAF12, TMED2, KMT5A, METTL5, TMEM175, AKAP1, PDE6B, RCL1, OPRD1, RILPL1, SMARCE1, SESN2, THEMIS2, CDC6, B3GNT4, DNAH10, MAEA, XXYLT1, PRKAG3, TSPOAP1, DPY19L4, STK3, GLIS3, CASC3, BRIP1, GTF2H3, TRIQK,</i>                                                                                                                                                                                                                                                                                                                                                                                                                                                                           |

|                                                 |          |     |                                                                                                                                                                                                                                                                                                                                                                                                                                                                                                                                                                                                                                                                                                                                                                                                                                                                                                                                                                                                                                                                                                                                                                                                                                                                                                                                                                                                                                                    |
|-------------------------------------------------|----------|-----|----------------------------------------------------------------------------------------------------------------------------------------------------------------------------------------------------------------------------------------------------------------------------------------------------------------------------------------------------------------------------------------------------------------------------------------------------------------------------------------------------------------------------------------------------------------------------------------------------------------------------------------------------------------------------------------------------------------------------------------------------------------------------------------------------------------------------------------------------------------------------------------------------------------------------------------------------------------------------------------------------------------------------------------------------------------------------------------------------------------------------------------------------------------------------------------------------------------------------------------------------------------------------------------------------------------------------------------------------------------------------------------------------------------------------------------------------|
| intracellular anatomical structure (GO:0005622) | 5.79E-05 | 142 | <p>NBAS, PPM1E, PCGF3, TJP1, AHDC1, HPD, MPO, LRRC43, HSF5, RAD51C, RNF212, SETD1B, SLC1A1, MTDH, MED13, CREB1, RILPL2, VPS33A, LTF, SNRNP35, RAD54B, MED1, STX12, UVSSA, SUPT4H1, METTL8, ATP6V0A2, ESRP1, ZNF142, VIRMA, NR1D1, ZCCHC8, RBM12B, MLXIP, LTF, EYA3, DCAF17, FAM76A, GMEB1, BCS1L, ARL5C, RPL30, COIL, CYP27A1, LOC100147364, RPA2, ST18, BCL7A, PSMD9</p> <p>CDK12, CLIP1, KRT24, UBR3, CCR7, SSB, DDX55, KNTC1, RNF25, MTMR4, IKZF3, PPP1R8, MED24, CCR3, AK3, TEX14, LOC100068349, TOP2A, RHOF, FGR, SLC49A3, KRT25, RPL19, THRA, TRNAU1AP, RB1CC1, DNAJC8, ERC2, POP1, IFI6, LAPTM4B, PDP1, SNTG1, RCC1, NKX1-1, KRT28, YTHDF2, ORMDL3, DIABLO, PIGG, DGKE, MSI2, LPO, GAK, STK36, DGKQ, ATP5IF1, CTBP1, RARA, TAF12, TMED2, KMT5A, CDC37L1, METTL5, KRT10B, TMEM175, KRT27, AKAP1, RCL1, OPRD1, RILPL1, SMARCE1, MYO3B, SESN2, PSMD3, THEMIS2, CDC6, B3GNT4, DNAH10, MAEA, XXYLT1, PRKAG3, TSPOAP1, DPY19L4, STK3, GLIS3, CCRL2, CASC3, BRIP1, GTF2H3, TRIQK, MSL1, NBAS, PPM1E, PCGF3, CCR2, TJP1, AHDC1, HPD, MPO, LRRC43, HSF5, RAD51C, RNF212, SETD1B, SLC1A1, GSDMA, MTDH, MED13, CREB1, RILPL2, METTL21A, VPS33A, TRIM25, LTF, SNRNP35, RAD54B, MED1, MYL5, STX12, UVSSA, SUPT4H1, METTL8, PHACTR4, ATP6V0A2, ESRP1, ZNF142, VIRMA, NR1D1, PCMTD1, ZCCHC8, KRT222, RBM12B, MLXIP, LTF, EIF2B1, EYA3, DCAF17, FAM76A, GMEB1, BCS1L, ARL5C, KRT26, RPL30, COIL, CYP27A1, LOC100147364, RPA2, CPLX1, ST18, BCL7A, PSMD9</p> |
| cellular anatomical entity (GO:0110165)         | 3.36E-03 | 173 | <p>CDK12, CLIP1, KRT24, UBR3, STAC2, CCR7, SSB, DDX55, KNTC1, COL22A1, RNF25, MTMR4, IKZF3, PPP1R8, IL31, MED24, CCR3, AK3, TEX14, LOC100068349, TOP2A, RHOF, FGR, SLC49A3, OPCML, KRT25, RPL19, GEM, TCTN2, THRA, TRNAU1AP, RB1CC1, DNAJC8, ERC2, POP1, TMEM67, IFI6, LAPTM4B, PDP1, SPATA6L, SNTG1, RCC1, NKX1-1, KRT28, FGFRL1, YTHDF2, IGFBP4, ORMDL3, DIABLO, PIGG, DGKE, NOG, MSI2, CSF3, LPO, GAK, STK36, DGKQ, ATP5IF1, CTBP1, RARA, TAF12, TMED2, KMT5A, CDC37L1, ALKAL1, METTL5, KRT10B, TMEM175, KRT27, AKAP1, PDE6B, RCL1, OPRD1, RILPL1, SMARCE1, MYO3B, SESN2, PSMD3, THEMIS2, CDC6, B3GNT4, DNAH10, MAEA, PDXNL, SLC26A1, MATN2, XXYLT1, PRKAG3, TSPOAP1, DPY19L4, STK3, GLIS3, CCRL2, CASC3, BRIP1, GTF2H3, TRIQK, MSL1, NBAS, CACNB1, PPM1E, PCGF3, CCR2, TNS4, TJP1, LRRC3C, AHDC1, HPD, MPO, LRRC43, HSF5, RAD51C, RNF212, SETD1B, XKR8, SLC1A1, GSDMA, MTDH, MED13, CREB1, RILPL2, METTL21A, VPS33A, TRIM25, GSDMB, LTF, SNRNP35, RAD54B, MED1, MYL5, STX12, UVSSA, SUPT4H1, METTL8, PHACTR4, ATP6V0A2, ESRP1, ZNF142, VIRMA, NTM, CDH17, NR1D1, PCMTD1, ZCCHC8, KRT222, RBM12B, MLXIP, LTF, EIF2B1, EYA3, DCAF17, FAM76A, GMEB1, BCS1L, KCNS2, SMPDL3B, NIPAL2, SPON2, ARL5C, KRT26, RPL30, RAPGEFL1, COIL, RNF43, CYP27A1, LOC100147364, PLXDC1, RPA2, CPLX1, ST18, BCL7A, PSMD9</p>                                                                                                                                         |
