# Supplementary material for: Using high-density SNP data to unravel the origin of the Franches-Montagnes horse breed
Source: Springer Nature journal article supplement (doi:10.1186/s12711-024-00922-6), 2024-07-10
Supplement: MOESM10 [file 12711_2024_922_MOESM10_ESM.pdf]

**Table S9** : Gene ontology analysis for the old-type Franches-Montagnes population

| <b>Term</b>                                                   | <b>Bonferroni adjusted p-value</b> | <b>N genes</b> | <b>Genes</b>                                                                                                                                                                        |
|---------------------------------------------------------------|------------------------------------|----------------|-------------------------------------------------------------------------------------------------------------------------------------------------------------------------------------|
| <b>GO biological process</b>                                  |                                    |                |                                                                                                                                                                                     |
| rhombomere development (GO:0021546)                           | 1.06E-02                           | 3              | <i>HOXB2, HOXB1, HOXB3</i>                                                                                                                                                          |
| embryonic skeletal system morphogenesis (GO:0048704)          | 3.31E-02                           | 5              | <i>HOXB9, HOXB2, HOXB1, HOXB5, HOXB3</i>                                                                                                                                            |
| regulation of transcription by RNA polymerase II (GO:0006357) | 9.02E-03                           | 25             | <i>CDK5RAP3, HOXB9, HOXB7, SP6, NFE2L1, HOXB8, NKX1-1, SKAP1, ZNF652, DGKQ, CTBP1, HOXB2, HOXB13, HOXB1, PCGF3, HOXB5, CBX1, HOXB3, HOXB6, MLLT6, SP2, KAT7, RPL23, PCGF, TBX21</i> |
