# Supplementary material for: Using high-density SNP data to unravel the origin of the Franches-Montagnes horse breed
Source: Springer Nature journal article supplement (doi:10.1186/s12711-024-00922-6), 2024-07-10

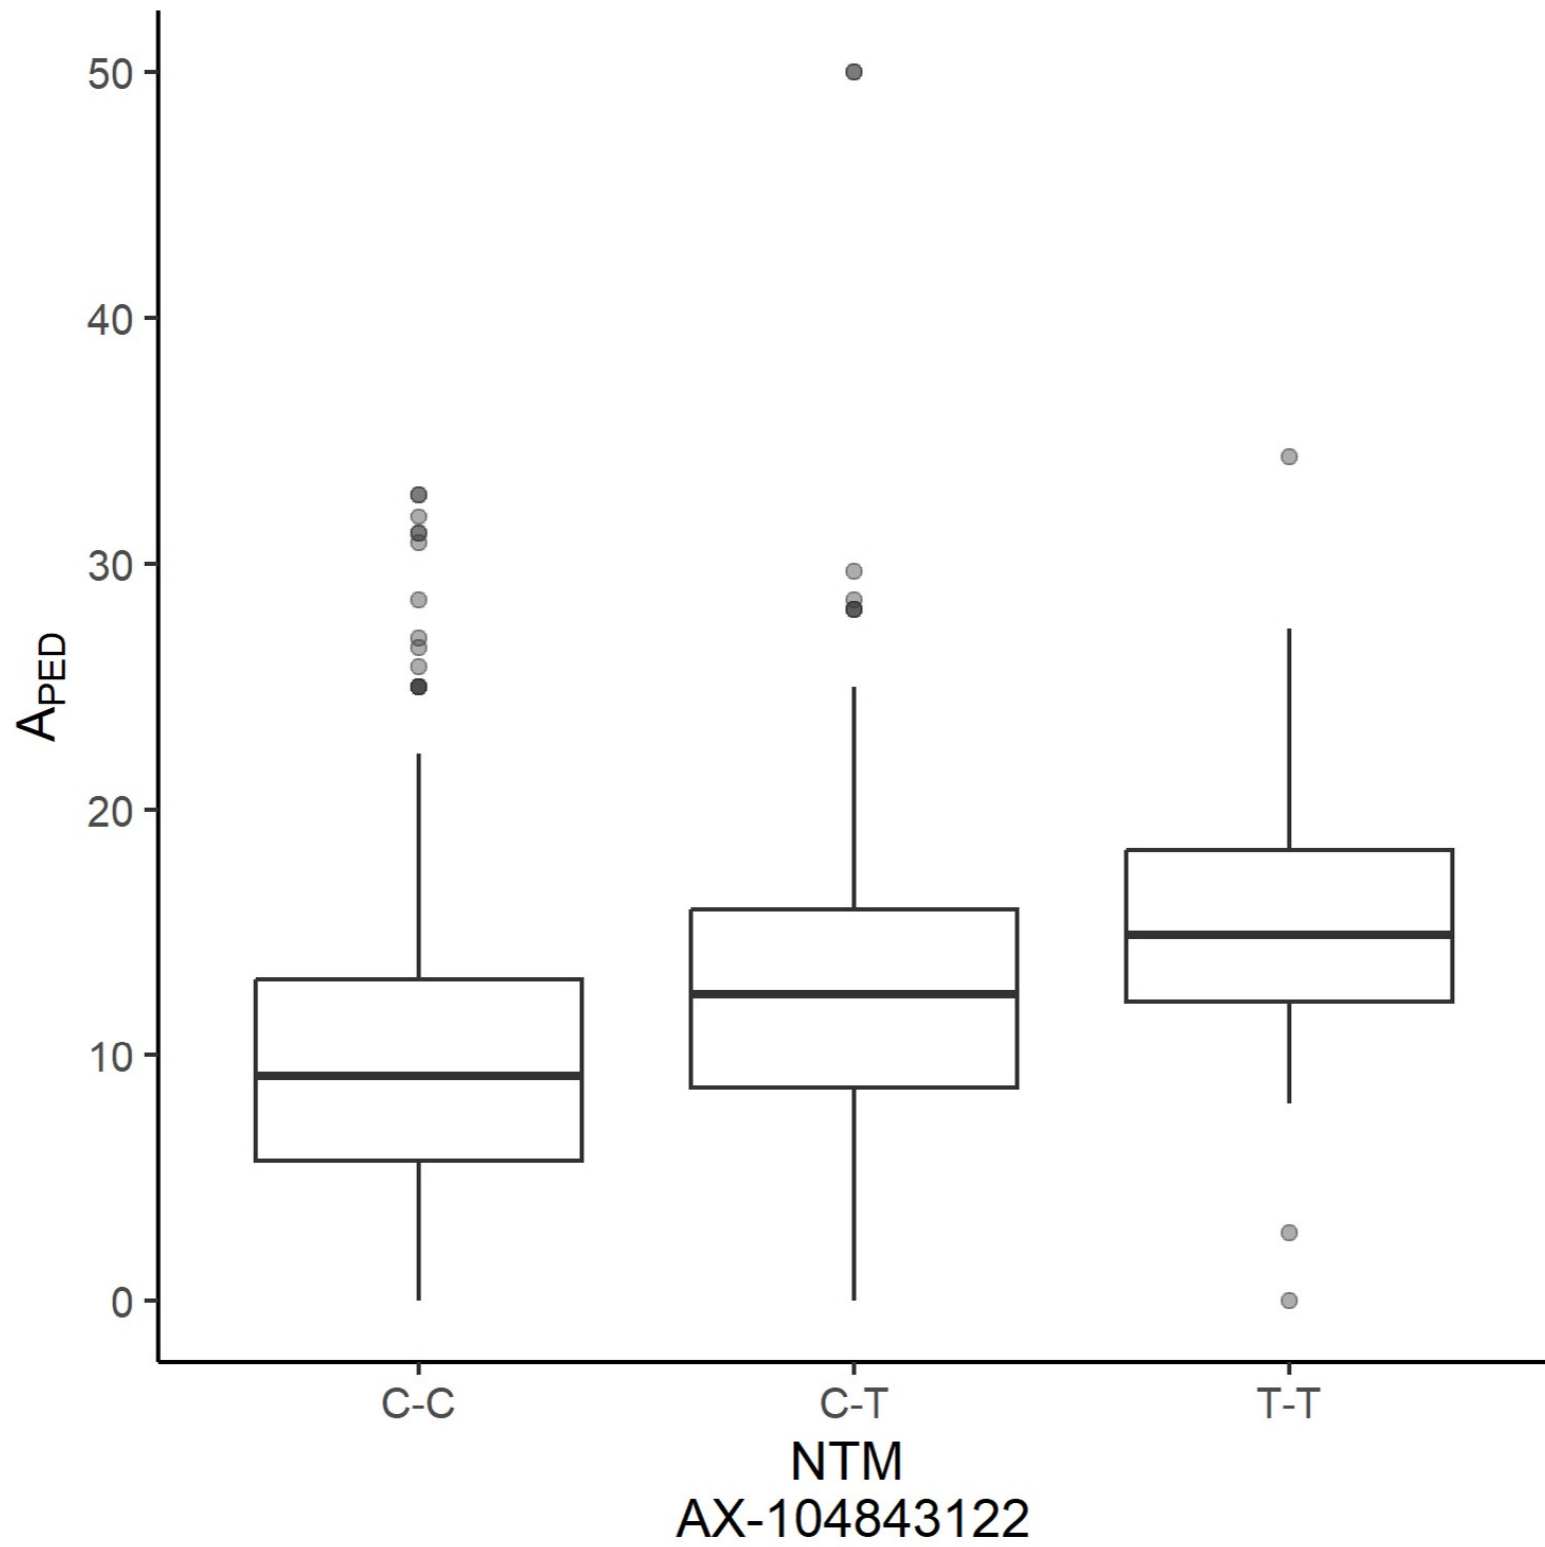

Supplement: MOESM12 [file 12711_2024_922_MOESM12_ESM.pdf]
